# Supplementary material
Source: Springer Nature journal article supplement (https://www.springermedizin.de/resource/supplementary/12933_2014_840_MOESM5_ESM.pdf/9539362)

**A**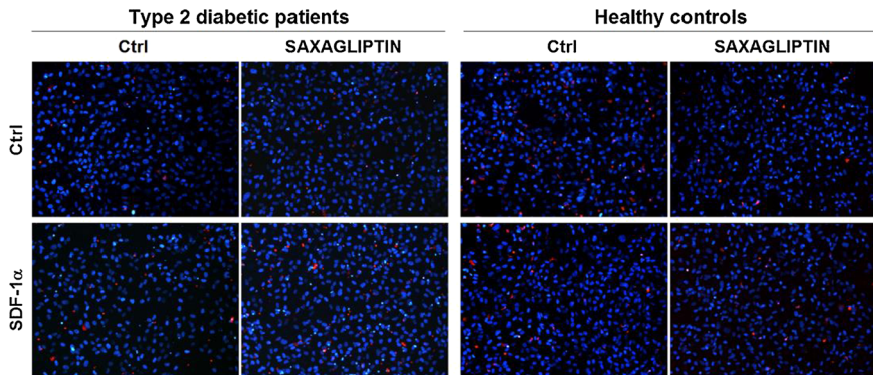**B**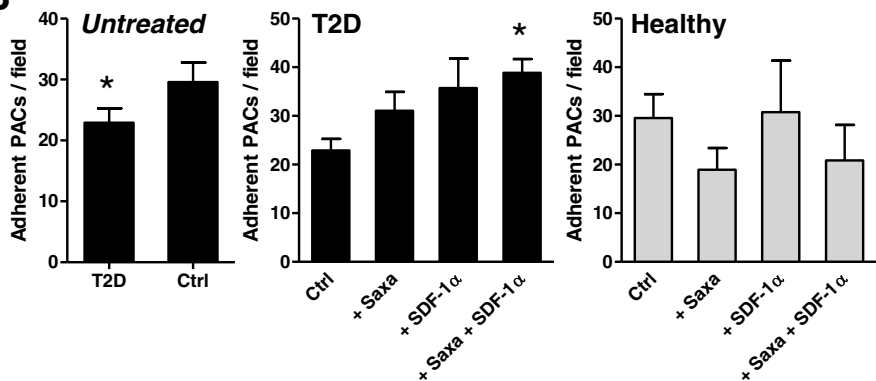**C**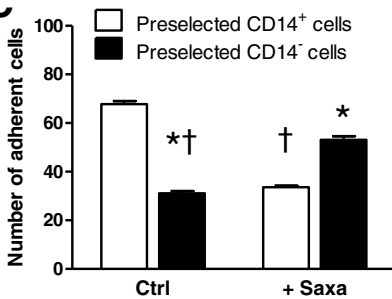**D**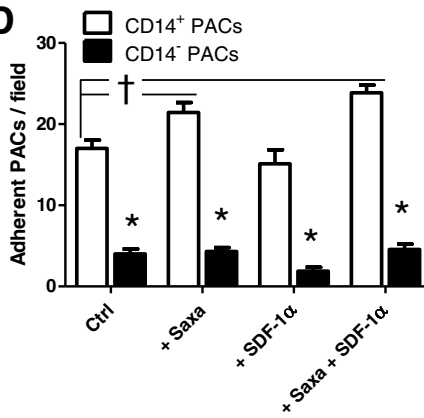

Supplement: MOESM5 [file 9539362]
